# Supplementary material for: Assessment of Bidirectional Relationships Between 98 Genera of the Human Gut Microbiota and Amyotrophic Lateral Sclerosis: A 2-Sample Mendelian Randomization Study
Source: Research Square preprint supplement (doi:10.21203/rs.3.rs-526836/v1), 2021-05-24
Supplement: Supplementary file 1 [file 3ac6f4033c4bbadcf3795ff1.xlsx]

## Sheet: Table 1
Table 1. Characteristics of selected SNPs for core gut microbiota.
Core gut microbiota	SNP	Chr.	Locus start	Locus end	A1	A2	P	Beta	SE	β-div P	Nearest gene	Genes in locus	Variance explained
OTU10032 unclassifed Enterobacteriaceae Species-level OTU	rs1009634	12	4779313	4900344	G	A	7.12e-09	-1.31	0.225251	0.93	AKAP3	NDUFA9, GALNT8, RP11-234B24.2	0.0183438
Bacilli class	rs10928827	2	129426740	129473850	G	A	1.02e-08	-0.22	0.038233	0.19	HS6ST1	-	0.0179646
Lactobacillales order	rs10928827	2	129426740	129473850	G	A	4.19e-09	-0.23	0.0389471	0.19	HS6ST2	-	0.0189033
Unclassifed Erysipelotrichaceae	rs11626933	14	90681816	90810659	G	A	1.83e-08	-0.24	0.0424568	0.55	C14orf102	C14orf102	0.017348
Marinilabiliaceae family	rs11724031	4	77441448	77467405	G	A	2.44e-10	-0.97	0.152353	0.68	SHROOM3	SHROOM3	0.021905
Unclassifed Marinilabiliaceae	rs11724031	4	77441448	77467405	G	A	2.44e-10	-0.97	0.152353	0.68	SHROOM3	SHROOM3	0.021905
Erysipelotrichaceae family	rs11877825	18	10566345	10595758	G	T	2.82e-11	-0.27	0.0403136	0.34	NAPG	-	0.0241832
Erysipelotrichia class	rs11877825	18	10566345	10595758	G	T	2.82e-11	-0.27	0.0403136	0.34	NAPG	-	0.0241832
Erysipelotrichales order	rs11877825	18	10566345	10595758	G	T	2.82e-11	-0.27	0.0403136	0.34	NAPG	-	0.0241832
Marinilabiliaceae family	rs11915634	3	1452602	1517331	T	C	2.99e-10	-1.3	0.205215	0.14	CNTN6	-	0.0216904
Unclassifed Marinilabiliaceae	rs11915634	3	1452602	1517331	T	C	2.99e-10	-1.3	0.205215	0.14	CNTN7	-	0.0216904
OTU10032 unclassifed Enterobacteriaceae	rs12149695	16	27205994	27293886	A	T	1.82e-09	0.61	0.100925	0.23	FLJ21408	NSMCE1, FLJ21408, KDM8	0.0197835
OTU15355 Dialister Species-level OTU	rs12442649	15	37968393	38035538	G	A	3.72e-08	-1.49	0.269561	0.85	TMCO5A	-	0.0166001
EscherichiaShigella	rs13096731	3	58014818	58089851	A	G	2.55e-08	-0.43	0.0768609	0.12	FLNB	FLNB	0.0169982
OTU10032 unclassifed Enterobacteriaceae	rs13276516	8	56589428	56596140	A	G	5.54e-09	-0.61	0.104125	0.41	TGS1	-	0.0186086
Lactobacillales order	rs1362404	16	51955443	52017380	T	G	1.56e-08	0.23	0.0404883	7.5e-05	TOX3	-	0.0175164
Bacilli class	rs148330122	19	38497288	38631252	C	T	1.32e-09	-0.48	0.0787311	0.18	SIPA1L3	SIPA1L3	0.0201226
OTU10032 unclassifed Enterobacteriaceae	rs17085775	9	71165704	71167878	C	T	2.06e-08	-1.03	0.182881	0.54	C9orf71	-	0.0172232
Erysipelotrichaceae family	rs17421787	4	131293675	131512291	C	G	3.6e-08	-0.3	0.0542167	0.16	RP11-22J15.1	-	0.0166346
Erysipelotrichales order	rs17421787	4	131293675	131512291	C	G	3.6e-08	-0.3	0.0542167	0.16	RP11-22J15.2	-	0.0166346
Erysipelotrichia class	rs17421787	4	131293675	131512291	C	G	3.6e-08	-0.3	0.0542167	0.16	RP11-22J15.3	-	0.0166346
Unclassifed Acidaminococcaceae	rs17661843	7	48381902	48433594	T	C	3.72e-14	-1.4	0.183444	0.26	ABCA13	ABCA13	0.0311756
Bacilli class	rs2071199	20	43030809	43037422	T	C	1.24e-08	-0.32	0.0559392	0.58	HNF4A–AS1	HNF4A	0.0177585
OTU10032 unclassifed Enterobacteriaceae Species-level OTU	rs2318350	8	139889972	139942500	T	C	3.65e-09	-1.15	0.193975	0.95	COL22A1	COL22A1	0.0190489
OTU10032 unclassifed Enterobacteriaceae	rs249733	5	141877862	141911748	T	C	4.74e-10	-0.65	0.103804	0.68	SPRY4	-	0.0212039
Actinobacteria class	rs34613612	21	32184901	32204347	C	G	6.34e-10	0.25	0.0402231	0.00987	KRTAP8-1	KRTAP8-1	0.0208968
Actinobacteria phylum	rs34613612	21	32184901	32204347	C	G	6.34e-10	0.25	0.0402231	0.00987	KRTAP8-1	KRTAP8-1	0.0208968
Enterobacteriaceae family	rs35275482	15	60027987	60128040	C	A	3.72e-11	-0.54	0.0811312	0.06	BNIP2	-	0.0238908
Enterobacteriales order	rs35275482	15	60027987	60128040	C	A	3.72e-11	-0.54	0.0811312	0.06	BNIP3	-	0.0238908
OTU10032 unclassifed Enterobacteriaceae Species-level OTU	rs3925158	3	38161078	38313688	C	G	6.29e-09	-1	0.171326	0.78	SLC22A13	SLC22A13, MYD88, DLEC1, ACAA1, OXSR1	0.0184746
Gammaproteobacteria class	rs4621152	2	217857450	217924261	C	T	1.4e-08	-0.29	0.0508819	0.79	AC007557.1	-	0.0176305
Blautia genus	rs4669413	2	9801744	9818596	T	C	1.2e-08	-0.18	0.0314347	0.75	RP11–521D12.1	-	0.0177931
Bacilli class	rs479105	12	3357596	3393503	T	C	1.21e-08	-0.22	0.0384298	0.48	PRMT8	-	0.0177844
Unclassifed Acidaminococcaceae	rs56006724	2	228486044	228523585	A	G	6.35e-10	-0.88	0.141591	0.93	C2orf83	C2orf83	0.0208951
Lactobacillales order	rs59042687	3	95359287	95823523	T	G	6.22e-09	-0.23	0.0393922	0.02	LINC00879	-	0.0184864
OTU13305 Fecalibacterium Species-level OTU	rs597205	1	112379026	112415622	T	C	7.68e-09	-0.62	0.106845	0.85	C1orf183	C1orf183	0.0182639
Lactobacillales order	rs62295801	3	162444724	163236170	G	T	5.32e-10	-0.27	0.0432456	0.21	LINC01192	LINC01192	0.021082
Lactobacillales order	rs7083345	10	7020329	7044987	T	C	2.89e-09	0.24	0.0395853	0.02	RP11-554I8.2	-	0.0199042
Bacilli class	rs7083345	10	7020329	7044987	T	C	3.38e-10	0.25	0.0402175	0.02	RP11-554I8.2	-	0.0209025
Lactobacillales order	rs7113056	11	122091502	122154110	C	T	1.72e-13	-0.5	0.0673353	0.07	RP11-166D19.1	-	0.0295626
Unclassifed Acidaminococcaceae	rs75036654	1	37717219	37780821	C	T	4.94e-10	-1.39	0.222214	0.06	LINC01137	-	0.0211602
Bacilli class	rs7646786	3	185729634	185742372	T	C	2.29e-08	-0.22	0.0391914	0.5	LOC344887	-	0.0171116
Unclassifed Porphyromonadaceae	rs7656342	4	9721358	9895176	A	G	2.8e-09	0.39	0.0652958	0.22	DRD5	SLC2A9, DRD5	0.0193288
Blautia genus	rs79387448	2	103099953	103239356	C	T	7.68e-11	-0.31	0.0473583	0.66	SLC9A2	SLC9A2	0.0231255
Unclassifed Porphyromonadaceae	rs9291879	5	66515817	66550855	C	T	3.51e-09	-0.58	0.0977232	0.08	CD180	-	0.0190902
Gammaproteobacteria class	rs9300430	13	98269478	98306405	C	T	1.3e-09	-0.61	0.100013	0.12	RAP2A	-	0.0201387
Proteobacteria phylum	rs9323326	14	58476448	58532709	A	G	8.76e-10	-0.21	0.0340727	0.02	SLC35F4	C14orf37	0.0205554
Unclassifed Enterobacteriaceae	rs938295	1	16087164	16124985	C	T	2.34e-08	-0.49	0.0873491	0.76	FBLIM1	FBLIM1	0.0170888
Unclassifed Marinilabiliaceae	rs9831278	3	98879786	98942990	C	T	2.53e-08	-1.16	0.207294	0.49	LINC00973	-	0.0170065
Marinilabiliaceae family	rs9831278	3	98879786	98942990	C	T	2.53e-08	-1.16	0.207294	0.49	LINC00974	-	0.0170065
Unclassifed Acidaminococcaceae	rs986417	14	60787269	61122040	C	T	2.63e-09	-1.4	0.233987	0.47	SIX6	SIX6, C14orf39, SIX1	0.0193949
Marinilabiliaceae family	rs9996716	4	77441448	77467405	G	A	5.58e-09	-0.69	0.117805	0.2	SHROOM3	SHROOM3	0.018601
Unclassifed Marinila-biliaceae	rs9996716	4	77441448	77467405	G	A	5.58e-09	-0.69	0.117805	0.2	SHROOM3	SHROOM3	0.018601
The 53 associations with bacterial abundance are grouped into 40 loci on the basis of LD. SNP, single-nucleotide polymorphisms; Chr, chromosome; A1, effect allele; A2, non-effect allele; P, meta-analysis P value for A1; Beta, meta-analysis coeffcient for A1; SE, standard error; β-div P, P value for association with β diversity.

## Sheet: eTable 1
eTable 1.Correlation Matrixes for Single Nucleotide Polymorphisms Predicting (a)OTU10032 unclassifed
Enterobacteriaceae Species-level OUT and (b)Unclassifed Acidaminococcaceae From SNiPA Pairwise LD.
(a)OTU10032 unclassifed Enterobacteriaceae Species-level OUT
SNPs	rs2318350	rs3925158
rs2318350	1	0
rs3925158	0	1
(b)Unclassifed Acidaminococcaceae
SNPs	rs17661843	rs56006724	rs75036654	rs986417
rs17661843	1	0	0	0
rs56006724	0	1	0	0
rs75036654	0	0	1	0
rs986417	0	0	0	1

## Sheet: eTable 2
eTable 2. Associations between gut microbiota and amyotrophic lateral sclerosis in sensitivity analyses.
Gut microbiota	Weighted mode		Weighted median		MR Egger		(intercept)
	OR(95%CI)	P-value	OR(95%CI)	P-value	OR(95%CI)	P-value	OR(95%CI)	P-value
OTU10032 unclassifed Enterobacteriaceae	1.04(1.00,1.07)	0.10498	1.03(1.00,1.06)	0.0319834	0.92(0.77,1.09)	0.413208	1.07(0.95,1.19)	0.342786
Lactobacillales order	1.03(0.94,1.13)	0.555557	1.01(0.96,1.08)	0.640723	1.00(0.83,1.20)	0.998965	1.00(0.95,1.05)	0.942964
Unclassifed Marinilabiliaceae	1.02(0.98,1.06)	0.359083	1.02(0.99,1.05)	0.20869	1.03(0.93,1.14)	0.669186	0.99(0.90,1.09)	0.874848
Unclassifed Acidaminococcaceae	1.02(0.99,1.05)	0.308475	1.02(1.00,1.04)	0.0287799	0.98(0.90,1.06)	0.69408	1.05(0.95,1.16)	0.412116
Marinilabiliaceae family	1.02(0.99,1.06)	0.345218	1.02(0.99,1.05)	0.219458	1.03(0.93,1.14)	0.669186	0.99(0.90,1.09)	0.874848
Bacilli class	1.06(0.94,1.19)	0.413206	1.00(0.93,1.06)	0.90677	0.87(0.67,1.12)	0.339571	1.04(0.97,1.11)	0.330584

## Sheet: eTable 3
eTable 3.Associations between gut microbiota and amyotrophic lateral sclerosis in in a
leave-one-out approach.
Gut microbiota	Excluded SNP	ALS results
		OR(95%CI)	P-value
Bacilli class	rs10928827	0.99(0.92,1.07)	0.802843
Bacilli class	rs148330122	1.02(0.97,1.08)	0.448541
Bacilli class	rs2071199	0.98(0.92,1.05)	0.627327
Bacilli class	rs479105	1.01(0.94,1.08)	0.841063
Bacilli class	rs7083345	1.01(0.94,1.08)	0.842747
Bacilli class	rs7646786	0.98(0.92,1.05)	0.603193
Lactobacillales order	rs10928827	1.00(0.95,1.05)	0.96093
Lactobacillales order	rs1362404	1.02(0.97,1.07)	0.441953
Lactobacillales order	rs59042687	1.00(0.95,1.05)	0.963635
Lactobacillales order	rs62295801	0.99(0.94,1.05)	0.796534
Lactobacillales order	rs7083345	1.02(0.97,1.07)	0.557245
Lactobacillales order	rs7113056	1.01(0.96,1.07)	0.677921
Marinilabiliaceae family	rs11724031	1.02(0.99,1.05)	0.315664
Marinilabiliaceae family	rs11915634	1.02(0.99,1.05)	0.303879
Marinilabiliaceae family	rs9831278	1.02(0.99,1.05)	0.199565
Marinilabiliaceae family	rs9996716	1.02(0.99,1.05)	0.216804
OTU10032 unclassifed Enterobacteriaceae	rs12149695	1.01(0.96,1.05)	0.733396
OTU10032 unclassifed Enterobacteriaceae	rs13276516	1.01(0.96,1.05)	0.732121
OTU10032 unclassifed Enterobacteriaceae	rs17085775	1.03(1.00,1.06)	0.0196747
OTU10032 unclassifed Enterobacteriaceae	rs249733	1.00(0.96,1.05)	0.885355
OTU10032 unclassifed Enterobacteriaceae	rs938295	1.02(0.98,1.06)	0.391074
Unclassifed Acidaminococcaceae	rs17661843	1.03(1.01,1.05)	0.0131363
Unclassifed Acidaminococcaceae	rs56006724	1.02(1.00,1.04)	0.069372
Unclassifed Acidaminococcaceae	rs75036654	1.03(1.01,1.05)	0.00482931
Unclassifed Acidaminococcaceae	rs986417	1.02(1.00,1.04)	0.05389
Unclassifed Marinilabiliaceae	rs11724031	1.02(0.99,1.05)	0.315664
Unclassifed Marinilabiliaceae	rs11915634	1.02(0.99,1.05)	0.303879
Unclassifed Marinilabiliaceae	rs9831278	1.02(0.99,1.05)	0.199565
Unclassifed Marinilabiliaceae	rs9996716	1.02(0.99,1.05)	0.216804

## Sheet: eTable 4
eTable 4. Associations between gut microbiota and amyotrophic lateral sclerosis in sensitivity analyses.
Gut microbiota	IVW method		Weighted mode		Weighted median		MR Egger		(intercept)
	OR(95%CI)	P-value	OR(95%CI)	P-value	OR(95%CI)	P-value	OR(95%CI)	P-value	OR(95%CI)	P-value
Gamma-Glu-Phe	1.96(1.50-2.55)	0.012	2.54(1.76, 3.67)	0.011	2.63(1.75, 3.94)	0.017	1.96(1.06, 3.30)	0.192	1.00 (0.99 ,1.00 )	0.880852
1-arachidonoyl-GPI	1.64(1.37-1.96)	0.005	1.80(1.35, 2.40)	0.039	1.23(0.95, 1.59)	0.427	1.42(1.02, 1.99)	0.304	1.00 (1.00 ,1.01 )	0.723186
3-methyl-2-oxobutyrate	2.78(1.98-3.90)	0.003	3.11(1.93, 5.02)	0.018	3.13(1.96, 5.03)	0.015	8.07(2.41, 27.10)	0.105	0.99 (0.97 ,1.00 )	0.41635
4-acetamidobutanoate	0.49(0.36, 0.66)	0.02	0.32(0.21, 0.48)	0.005	0.89(0.59, 1.33)	0.775	0.49(0.23, 1.05)	0.358	1.00 (0.99 ,1.01 )	0.909505
IVW: inverse variance- weighted method; OR: odds ratio; CI: confidence interval;
Gamma-Glu-Phe: gamma-glutamylphenylalanine;
1-arachidonoyl-GPI: 1-arachidonoylglycerophosphoinositol;
3-methyl-2-oxobutyrate: 3-methyl-2-oxobutyrate

## Sheet: eTable 5
eTable 5. Effect estimates for association of genetically predicted amyotrophic lateral sclerosis
with gut microbiota using inverse variance weighting method.
Gut microbiota	No. of SNPs	Beta	SE	P-value
OTU4607_Sutterella	2	2.22536	0.957838	0.0201625
OTU3324_Bacteroides	2	1.56201	0.845074	0.0645493
OTU676_Bacteroides	2	1.18818	0.733963	0.105479
OTU15355_Dialister	2	0.950626	0.775984	0.220553
OTU2658_Bacteroides	2	0.71074	0.452145	0.115967
OTU12187_Parasutterella	2	0.620925	0.798587	0.436846
unclassified_Acidaminococcaceae	2	0.557966	0.712863	0.433797
Lactobacillales_ORDER	2	0.511074	0.217185	0.0186137
OTU7259_unclassified_Marinilabiliaceae	2	0.493217	0.924671	0.593759
OTU2503_Bacteroides	2	0.475866	0.386706	0.218486
Phascolarctobacterium	2	0.429692	0.682236	0.528806
Bacilli_CLASS	2	0.406876	0.215924	0.0595185
OTU4251_Alistipes	2	0.400543	0.597387	0.502545
OTU6927_Parasutterella	2	0.360496	0.508034	0.477958
Gammaproteobacteria_CLASS	2	0.35751	0.802791	0.656079
OTU10589_unclassified_Enterobacteriaceae	2	0.347089	0.697166	0.618585
OTU4459_Lachnospiracea_incertae_sedis	2	0.331559	0.274922	0.227813
OTU7516_Bacteroides	2	0.284508	0.397778	0.474459
Enterobacteriaceae_FAMILY	2	0.280367	0.818189	0.731848
Enterobacteriales_ORDER	2	0.280367	0.818189	0.731848
OTU9812_Bacteroides	2	0.251672	0.234111	0.282369
OTU5228_Bacteroides	2	0.242277	0.636437	0.703442
unclassified_Porphyromonadaceae	2	0.231237	0.350108	0.508951
OTU4219_unclassified_Ruminococcaceae	2	0.208501	0.503603	0.67886
Barnesiella	2	0.187447	0.377451	0.619463
Ruminococcus	2	0.183011	0.312595	0.55824
Porphyromonadaceae_FAMILY	2	0.167498	0.169147	0.322051
Acidaminococcaceae_FAMILY	2	0.157935	0.439861	0.719553
OTU14567_Bacteroides	2	0.140784	0.312801	0.652656
Proteobacteria_PHYLA	2	0.137374	0.328175	0.675509
unclassified_Enterobacteriaceae	2	0.126421	0.915358	0.890153
OTU13305_Faecalibacterium	2	0.119018	0.625436	0.849077
OTU7582_Alistipes	2	0.111076	0.554339	0.841187
Rikenellaceae_FAMILY	2	0.102882	0.22164	0.642516
unclassified_Clostridiales	2	0.0958715	0.207325	0.64378
unclassified_Ruminococcaceae	2	0.0883845	0.140607	0.529616
Blautia	2	0.072929	0.221843	0.742351
Parabacteroides	2	0.0556431	0.215023	0.795807
Faecalibacterium	2	0.0537347	0.196004	0.783968
OTU9738_Prevotella	2	0.0466327	0.843611	0.955917
unclassified_Erysipelotrichaceae	2	0.0448373	0.31222	0.88581
Dialister	2	0.0439944	0.436741	0.919762
Prevotella	2	0.0348873	0.505203	0.944945
unclassified_Lachnospiraceae	2	0.034523	0.132135	0.793884
OTU14062_Faecalibacterium	2	0.033654	0.286904	0.906622
OTU16494_Faecalibacterium	2	0.032639	0.279553	0.907055
OTU1766_Parabacteroides	2	0.0263317	0.297473	0.929465
OTU19036_Dialister	2	0.0218523	0.574802	0.969674
OTU10032_unclassified_Enterobacteriaceae	2	0.0101953	0.569483	0.985717
Lachnospiraceae_FAMILY	2	0.00455557	0.138425	0.973746
Negativicutes_CLASS	2	0.00442332	0.206351	0.982898
Selenomonadales_ORDER	2	0.00442332	0.206351	0.982898
Firmicutes_PHYLA	2	-0.00307292	0.0699952	0.964983
OTU2930_Bacteroides	2	-0.00539028	0.483064	0.991097
Clostridiales_ORDER	2	-0.00684119	0.0720528	0.924357
Clostridia_CLASS	2	-0.00762515	0.0723276	0.916038
Ruminococcaceae_FAMILY	2	-0.0104168	0.0987257	0.915969
Bacteroidales_ORDER	2	-0.0110932	0.0803579	0.890203
Bacteroidia_CLASS	2	-0.0110932	0.0803579	0.890203
Bacteroidetes_PHYLA	2	-0.0150078	0.0809205	0.852866
Deltaproteobacteria_CLASS	2	-0.0235798	0.345206	0.945542
Alistipes	2	-0.0276983	0.318216	0.930638
Desulfovibrionales_ORDER	2	-0.0332661	0.337067	0.921382
Desulfovibrionaceae_FAMILY	2	-0.0335164	0.337164	0.920815
OTU5370_Prevotella	2	-0.0396778	0.730909	0.956708
EscherichiaShigella	2	-0.0544742	0.54778	0.920785
OTU8314_Alistipes	2	-0.0611959	0.357537	0.864098
Bacteroidaceae_FAMILY	2	-0.0693667	0.130599	0.595319
OTU756_Parabacteroides	2	-0.0707291	0.465107	0.879131
OTU6294_unclassified_Ruminococcaceae	2	-0.0748958	0.814243	0.926712
Bacteroides	2	-0.0823363	0.132045	0.532924
OTU16802_Bacteroides	2	-0.0918147	0.319581	0.773885
Veillonellaceae_FAMILY	2	-0.102449	0.300303	0.73299
Prevotellaceae_FAMILY	2	-0.106272	0.38525	0.782663
OTU9211_Faecalibacterium	2	-0.109431	0.251013	0.662868
Actinobacteria_CLASS	2	-0.131995	0.200349	0.510008
Actinobacteria_PHYLA	2	-0.131995	0.200349	0.510008
OTU2958_Bacteroides	2	-0.152941	0.743257	0.83697
Erysipelotrichaceae_FAMILY	2	-0.159591	0.285877	0.576673
Erysipelotrichales_ORDER	2	-0.159591	0.285877	0.576673
Erysipelotrichia_CLASS	2	-0.159591	0.285877	0.576673
OTU12074_Dialister	2	-0.173758	0.584839	0.766387
Roseburia	2	-0.190374	0.193611	0.325468
OTU6162_Barnesiella	2	-0.20582	0.577543	0.721562
Oscillibacter	2	-0.21157	0.200491	0.291305
Betaproteobacteria_CLASS	2	-0.306942	0.30856	0.319856
Burkholderiales_ORDER	2	-0.30728	0.310575	0.322471
OTU8267_unclassified_Ruminococcaceae	2	-0.398608	0.569489	0.483964
Sutterellaceae_FAMILY	2	-0.405525	0.295671	0.170206
Parasutterella	2	-0.411353	0.590525	0.486061
OTU8041_Lachnospiracea_incertae_sedis	2	-0.481689	0.295137	0.102661
unclassified_Prevotellaceae	2	-0.494706	0.45073	0.272394
OTU7674_Faecalibacterium	2	-0.506583	0.428477	0.237092
Marinilabiliaceae_FAMILY	2	-0.561115	0.559159	0.315621
unclassified_Marinilabiliaceae	2	-0.561115	0.559159	0.315621
Sutterella	2	-0.698595	0.514681	0.174674
OTU4608_Phascolarctobacterium	2	-0.871496	0.801282	0.276759
OTU757_Bacteroides	2	-0.885638	0.74427	0.234069
